# Supplementary material
Source: Research Square preprint supplement (doi:10.21203/rs.3.rs-9180565/v1)

Supplementary Material 2 - Efficacy and standard error of efficacy measurements of tirzepatide and semaglutide second stage

| <b>Outcome</b>                                                           | <b>Efficacy of Tirzepatide (Standard error)</b> | <b>Efficacy of Semaglutide (Standard error)</b> |
|--------------------------------------------------------------------------|-------------------------------------------------|-------------------------------------------------|
| Proportion of individuals who achieved a weight reduction of $\geq 10\%$ | 81.60% (2.01)                                   | 60.50% (2.52)                                   |
| Proportion of individuals who achieved a weight reduction of $\geq 15\%$ | 64.60% (2.47)                                   | 40.10% (2.53)                                   |
| Proportion of individuals who achieved a weight reduction of $\geq 20\%$ | 48.40% (2.58)                                   | 27.30% (2.30)                                   |
| Proportion of individuals who achieved a weight reduction of $\geq 25\%$ | 31.60% (2.40)                                   | 16.10% (1.90)                                   |

---

Based on: Aronne et al., 2025

Supplementary Material 3 - Certainty of evidence according to the GRADE system

**Tirzepatide compared to Semaglutide of Obesity**

| Certainty Assessment                |              |               |                   |             |                  |                               | Summary of Results    |                  |                         |                            |                                  |
|-------------------------------------|--------------|---------------|-------------------|-------------|------------------|-------------------------------|-----------------------|------------------|-------------------------|----------------------------|----------------------------------|
| Participants (studies)<br>Follow-up | Risk of bias | Inconsistency | Indirect evidence | Imprecision | Publication bias | Overall certainty of evidence | Study event rates (%) |                  | Relative effect (95%CI) | Potential absolute effects |                                  |
|                                     |              |               |                   |             |                  |                               | With Semaglutide      | With Tirzepatide |                         | Risk with Semaglutide      | Risk difference with Tirzepatide |

**Least squares mean percentage change in body weight (follow-up: mean 72 weeks)**

|                |                     |             |             |             |      |                               |                                                                                                                                                                   |  |  |  |  |
|----------------|---------------------|-------------|-------------|-------------|------|-------------------------------|-------------------------------------------------------------------------------------------------------------------------------------------------------------------|--|--|--|--|
| 750<br>(1 RCT) | Severe <sup>a</sup> | not serious | not serious | not serious | none | ⊕⊕⊕○<br>Moderate <sup>a</sup> | Difference between treatments = -6.5% (95% CI -8.1 to -4.9) Tirzepatide group = -20.2% (95% CI -21.4 to -19.1) Semaglutide group = -13.7% (95% CI -14.9 to -12.6) |  |  |  |  |
|----------------|---------------------|-------------|-------------|-------------|------|-------------------------------|-------------------------------------------------------------------------------------------------------------------------------------------------------------------|--|--|--|--|

**Least squares mean change in waist circumference - cm (follow-up: mean 72 weeks)**

|                |                     |             |             |             |      |                               |                                                                                                                                                                            |  |  |  |  |
|----------------|---------------------|-------------|-------------|-------------|------|-------------------------------|----------------------------------------------------------------------------------------------------------------------------------------------------------------------------|--|--|--|--|
| 750<br>(1 RCT) | Severe <sup>b</sup> | not serious | not serious | not serious | none | ⊕⊕⊕○<br>Moderate <sup>b</sup> | Difference between treatments = -5.4cm (95% CI -7.1 to -3.6)<br>Tirzepatide group = -18.4cm (95% CI -19.6 to -17.2)<br>Semaglutide group = -13.0cm (95% CI -14.3 to -11.7) |  |  |  |  |
|----------------|---------------------|-------------|-------------|-------------|------|-------------------------------|----------------------------------------------------------------------------------------------------------------------------------------------------------------------------|--|--|--|--|

**Least squares mean change in body weight - kg (follow-up: mean 72 weeks)**

|                |                     |            |            |            |      |                               |                                                                                                                                                                               |  |  |  |  |
|----------------|---------------------|------------|------------|------------|------|-------------------------------|-------------------------------------------------------------------------------------------------------------------------------------------------------------------------------|--|--|--|--|
| 750<br>(1 RCT) | Severe <sup>c</sup> | not severe | not severe | not severe | none | ⊕⊕⊕○<br>Moderate <sup>c</sup> | Difference between treatments = -7.9 kg (95% CI -9.7 to -6.0)<br>Tirzepatide group = -22.8 kg (95% CI -24.1 to -21.5)<br>Semaglutide group = -15.0 kg (95% CI -16.3 to -13.7) |  |  |  |  |
|----------------|---------------------|------------|------------|------------|------|-------------------------------|-------------------------------------------------------------------------------------------------------------------------------------------------------------------------------|--|--|--|--|

**Mean least squares change in Body Mass Index (BMI) (follow-up: mean 72 weeks)**

|                |                     |            |            |            |      |                               |                                                                                                                                                          |  |  |  |  |
|----------------|---------------------|------------|------------|------------|------|-------------------------------|----------------------------------------------------------------------------------------------------------------------------------------------------------|--|--|--|--|
| 750<br>(1 RCT) | severe <sup>d</sup> | not severe | not severe | not severe | none | ⊕⊕⊕○<br>Moderate <sup>d</sup> | Between-group difference= -2.7 (95% CI -3.3 to -2.0)<br>Tirzepatide group = -8.0 (95% CI -8.5 to -7.5)<br>Semaglutide group = -5.3 (95% CI -5.8 to -4.8) |  |  |  |  |
|----------------|---------------------|------------|------------|------------|------|-------------------------------|----------------------------------------------------------------------------------------------------------------------------------------------------------|--|--|--|--|

**Weight reduction of ≥10% (follow-up: mean 72 weeks)**

|                |                       |            |            |            |      |                                 |                    |                    |                               |             |                                                       |
|----------------|-----------------------|------------|------------|------------|------|---------------------------------|--------------------|--------------------|-------------------------------|-------------|-------------------------------------------------------|
| 750<br>(1 RCT) | severe <sup>d,c</sup> | not severe | not severe | not severe | none | ⊕⊕⊕○<br>Moderate <sup>d,c</sup> | 227/376<br>(60.4%) | 304/374<br>(81.3%) | <b>RR 1.3</b><br>(1.2 to 1.5) | <b>Low</b>  |                                                       |
|                |                       |            |            |            |      |                                 |                    |                    |                               | 0 per 1 000 | <b>0 fewer per 1 000</b><br>(from 0 fewer to 0 fewer) |

**Weight reduction of ≥15% (follow-up: mean 72 weeks)**

|                |                     |            |            |            |      |                               |                    |                    |                               |                    |                                                          |
|----------------|---------------------|------------|------------|------------|------|-------------------------------|--------------------|--------------------|-------------------------------|--------------------|----------------------------------------------------------|
| 750<br>(1 RCT) | severe <sup>f</sup> | not severe | not severe | not severe | none | ⊕⊕⊕○<br>Moderate <sup>f</sup> | 151/376<br>(40.2%) | 241/374<br>(64.4%) | <b>RR 1.6</b><br>(1.4 to 1.9) | 151/376<br>(40.2%) | <b>241 more per 1 000</b><br>(from 161 more to 361 more) |
|----------------|---------------------|------------|------------|------------|------|-------------------------------|--------------------|--------------------|-------------------------------|--------------------|----------------------------------------------------------|

**Weight reduction of ≥20% (follow-up: mean 72 weeks)**

|                |                     |            |            |            |      |                               |                |                    |                               |                |                                                          |
|----------------|---------------------|------------|------------|------------|------|-------------------------------|----------------|--------------------|-------------------------------|----------------|----------------------------------------------------------|
| 750<br>(1 RCT) | severe <sup>g</sup> | not severe | not severe | not severe | none | ⊕⊕⊕○<br>Moderate <sup>g</sup> | 60/376 (16.0%) | 118/374<br>(31.6%) | <b>RR 2.0</b><br>(1.5 to 2.2) | 60/376 (16.0%) | <b>219 more per 1 000</b><br>(from 137 more to 329 more) |
|----------------|---------------------|------------|------------|------------|------|-------------------------------|----------------|--------------------|-------------------------------|----------------|----------------------------------------------------------|

**Weight reduction of ≥25% (follow-up: mean 72 weeks)**

|                |                     |            |            |            |      |                               |                |                    |                               |                |                                                         |
|----------------|---------------------|------------|------------|------------|------|-------------------------------|----------------|--------------------|-------------------------------|----------------|---------------------------------------------------------|
| 750<br>(1 RCT) | severe <sup>h</sup> | not severe | not severe | not severe | none | ⊕⊕⊕○<br>Moderate <sup>h</sup> | 60/376 (16.0%) | 118/374<br>(31.6%) | <b>RR 2.0</b><br>(1.5 to 2.6) | 60/376 (16.0%) | <b>160 more per 1 000</b><br>(from 80 more to 255 more) |
|----------------|---------------------|------------|------------|------------|------|-------------------------------|----------------|--------------------|-------------------------------|----------------|---------------------------------------------------------|

**Adverse events reported during treatment (%) (follow-up: mean 72 weeks)**

|                |            |            |            |            |      |              |                    |                    |               |                    |  |
|----------------|------------|------------|------------|------------|------|--------------|--------------------|--------------------|---------------|--------------------|--|
| 750<br>(1 RCT) | not severe | not severe | not severe | not severe | none | ⊕⊕⊕⊕<br>High | 297/376<br>(79.0%) | 287/374<br>(76.7%) | Not estimable | 297/376<br>(79.0%) |  |
|----------------|------------|------------|------------|------------|------|--------------|--------------------|--------------------|---------------|--------------------|--|

**Serious adverse events (%) (follow-up: mean 72 weeks)**

|                |            |            |            |            |      |              |               |               |               |               |  |
|----------------|------------|------------|------------|------------|------|--------------|---------------|---------------|---------------|---------------|--|
| 750<br>(1 RCT) | not severe | not severe | not severe | not severe | none | ⊕⊕⊕⊕<br>High | 13/376 (3.5%) | 18/374 (4.8%) | Not estimable | 13/376 (3.5%) |  |
|----------------|------------|------------|------------|------------|------|--------------|---------------|---------------|---------------|---------------|--|

**Adverse events leading to study discontinuation (%) (follow-up: mean 72 weeks)**

|                |            |            |            |            |      |              |              |              |               |              |  |
|----------------|------------|------------|------------|------------|------|--------------|--------------|--------------|---------------|--------------|--|
| 750<br>(1 RCT) | not severe | not severe | not severe | not severe | none | ⊕⊕⊕⊕<br>High | 6/376 (1.6%) | 6/374 (1.6%) | Not estimable | 6/376 (1.6%) |  |
|----------------|------------|------------|------------|------------|------|--------------|--------------|--------------|---------------|--------------|--|

Legend: a. The study was not blinded; b. Absence of blinding; c. Open study; d. Unblinded study; e. Absence of blinding; f. Absent blinding; g. Absent blindin; h. No blinding; CI. Confidence Interval; RR. Risk Ratio

Supplementary Material 4 - Assessment of methodological quality according to RoB2.0 for efficacy outcome

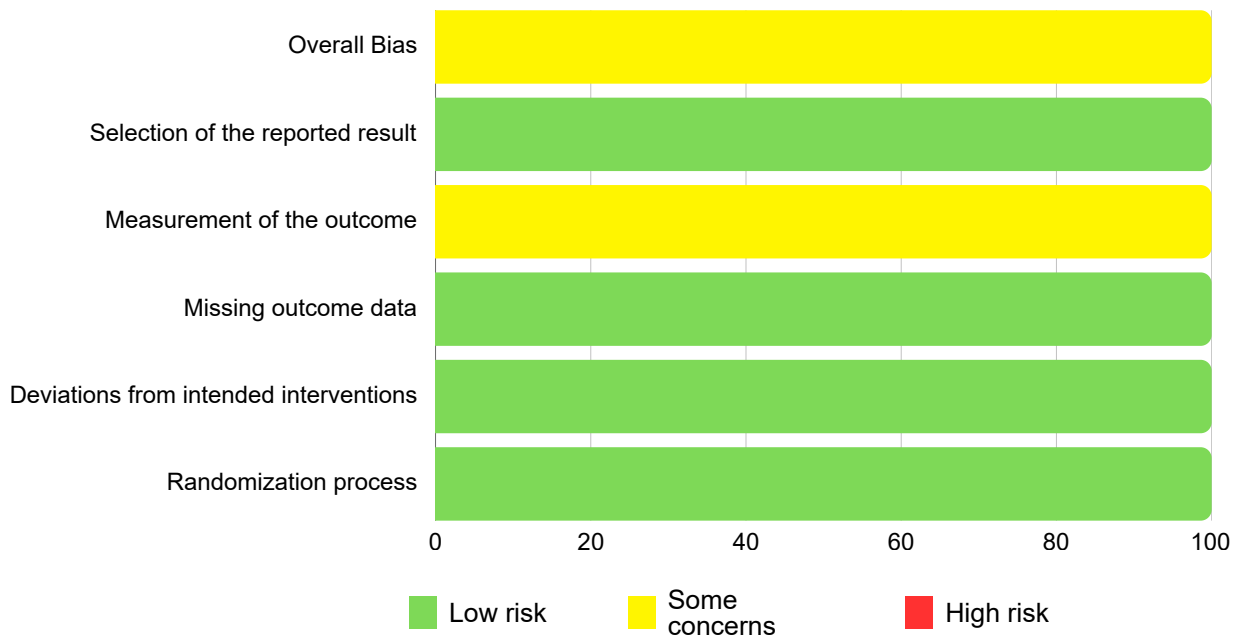

Supplementary Material 5 - Assessment of methodological quality according to RoB2.0 for safety outcome

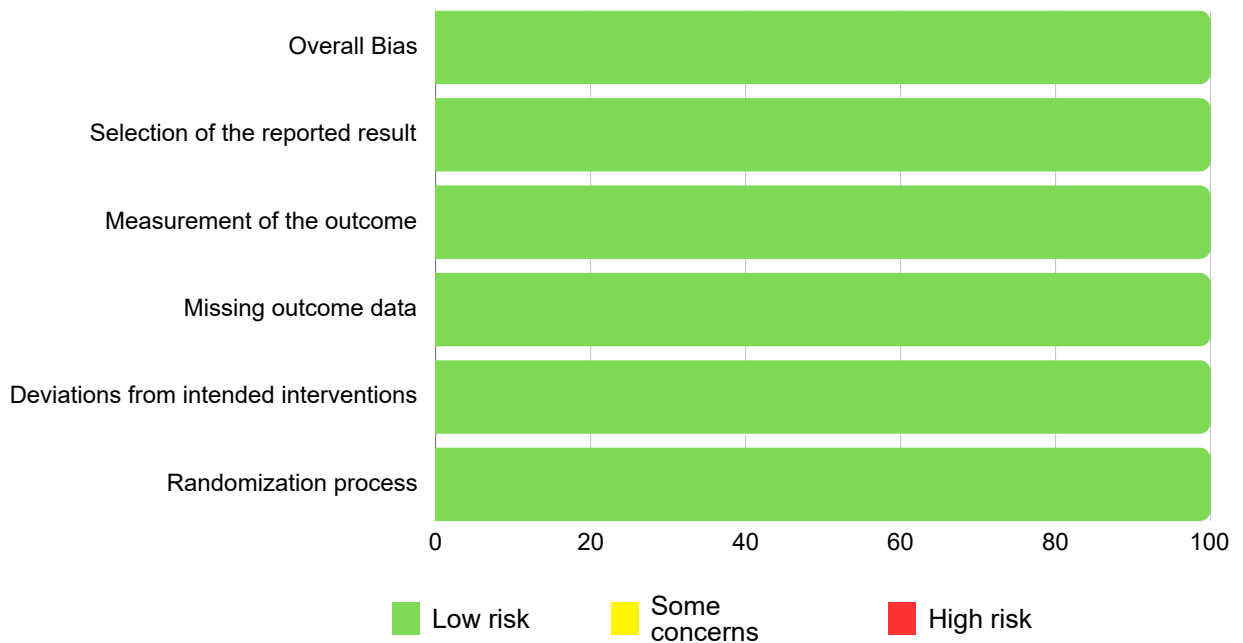

Supplement: Supplementary file 1 [file 85749e35d37c1d5f43359196.pdf]
