# Supplementary material
Source: Research Square preprint supplement (doi:10.21203/rs.3.rs-9180565/v1)
Supplement: Supplementary file 1 [file 15145000e10c8def1396c34b.xlsx]

## Sheet: Sheet1
Table 1 - Parameters used in the model according to the source.
Parameter	Value	Source
Population of Mato Grosso ≥ 18 yearsa	2026: 2 778 386	IBGE (26)
	2027: 2 827 399
	2028: 2 875 629
	2029: 2 924 560
	2030: 2 972 324
Proportion of adults with BMI 25 to 29.9 (%) b	38.84	Vigitel 2023 (24)
Proportion of adults with BMI 30 to 34.9 (%) b	16.53	Vigitel 2023 (24)
Proportion of adults with BMI 35 to 39.9 (%) b	7.12	Vigitel 2023 (24)
Proportion of adults with BMI ≥40 (%) b	2.69	Vigitel 2023 (24)
Average annual increase in the prevalence of overweight (%)	0.98	Estivaleti, J.M et. al., 2022 (28)
Average annual increase in obesity prevalence (%)	0.65	Estivaleti, J.M et. al., 2022 (28)
Average annual increase in the prevalence of grade II and III obesity (%)	0.18	Estivaleti, J.M et. al., 2022 (28)
Frequency of comorbidities among overweight individuals (%)	33.22	Vigitel 2023 (24)
Frequency of comorbidities among individuals with obesity (%)	50.1	Aronne LJ et. al., 2025 (14)
Market share tirzepatide (%) d	50.4	Novo Nordisk (20)
Market share semaglutide (%)	49.6	Novo Nordisk (20)
Cost of semaglutide/patient in year 1 ($)	2 855.29	Calculated
Cost of semaglutide/patient years 2 to 4 ($)	3 274.83	Calculated
Cost of tirzepatide/patient in year 1 ($)	5 445.96	Calculated
Cost of tirzepatide/patient in years 2 to 4 ($)	5 445.96	Calculated
Legend: aPopulation >20 years used as a proxy. bData from Vigitel 2023 (height and weight) for the capital Cuiabá were extrapolated to the population of Mato Grosso to calculate the body mass index (BMI), which, after calculation, were grouped into strata. cCalculated based on data from Vigitel 2023, through the calculation of the proportion of individuals with a BMI of 25.00 – 29.99 who use medi…
