# Supplementary material
Source: Research Square preprint supplement (doi:10.21203/rs.3.rs-9180565/v1)
Supplement: Supplementary file 2 [file 17f8251978ef244793df4ba6.xlsx]

## Sheet: Sheet1
Table 3 - Cost of control according to the medication adopted for a 72-week time horizon in US dollars $ (February 2026).
	Tirzepatide		Semaglutide
Weight loss goals	Cost/respondent	Drug cost index	Cost/respondent	Amount spent to achieve target relative to USD 1 spent
Weight loss of ≥10%	$9 240.88	$1	$6 801.39	0.74*
Weight loss of ≥15%	$11 672.69	$1	$10 261.45	0.88
Weight loss of ≥20%	$15 579.67	$1	$15 072.67	0.97
Weight loss of ≥25%	$23 862.53	$1	$25 558.01	1.07
Legend: *For every dollar spent to get patients to the therapeutic goal with tirzepatide in 72 weeks, it would be necessary to spend US$0.74 on semaglutide.
