# Supplementary material
Source: Research Square preprint supplement (doi:10.21203/rs.3.rs-9180565/v1)
Supplement: Supplementary file 3 [file 56a970556a3cae92ff3ca912.xlsx]

## Sheet: Sheet1
Table 5 – Budgetary impact by year, population and technology considered in US dollars (February 2026)
Restricted Population – Individuals with a BMI ≥35 with multiple comorbidities
Scenario	2026	2027	2028	2029	2030	Accumulated
Tirzepatide	74 M	151 M	231 M	313 M	398 M	1.167 B
Semaglutide	39 M	91 M	139 M	188 M	239 M	696 M
Large Population - All obese and overweight individuals with at least one comorbidity
Scenario	2026	2027	2028	2029	2030	Accumulated
Tirzepatide	598 M	1.217 B	1.857 B	2.518 B	3.199 B	9.388 B
Semaglutide	314 M	732 M	1.117 B	1.514 B	1.923 B	5.599 B
