# Supplementary material
Source: Research Square preprint supplement (doi:10.21203/rs.3.rs-9180565/v1)
Supplement: Supplementary file 4 [file 5ece7247f6408884d1926eac.xlsx]

## Sheet: Sheet1
Table 4 - Sensitivity analysis according to minimum and maximum effectiveness values for intervention and control in US dollars.
Semaglutide
Weight loss goals	Cost per respondent	Cost per respondent	Amount spent to achieve target relative to USD 1 spent (Minimum)	Amount spent to achieve target relative to USD 1 spent (Maximum)
	(Minimum)	(Maximum)
Weight loss of ≥10%	$7 094.55	$6 531.49	0.75	0.72
Weight loss of ≥15%	$10 943.72	$9 659.25	0.90	0.86
Weight loss of ≥20%	$16 459.36	$13 901.49	1.00	0.94
Weight loss of ≥25%	$28 977.75	$22 860.22	1.12	1.03
Tirzepatide
Weight loss goals	Cost per respondent	Cost per respondent	Drug cost index	Drug cost index
	(Minimum)	(Maximum)
Weight loss of ≥10%	$9 473.07	$9 019.81	1.00	1.00
Weight loss of ≥15%	$12 142.61	$11 237.79	1.00	1.00
Weight loss of ≥20%	$16 464.10	$14 785.41	1.00	1.00
Weight loss of ≥25%	$25 823.84	$22 178.12	1.00	1.00
