# Supplementary material
Source: Research Square preprint supplement (doi:10.21203/rs.3.rs-9180565/v1)
Supplement: Supplementary file 5 [file 7192f4be0347ca5aa74127a4.xlsx]

## Sheet: Sheet1
Database	Search strategy			Retrieved titles (n)
Medline/Pubmed	((((((((((("Orlistat"[Mesh] OR Tetrahydrolipastatin OR Tetrahydrolipstatin OR THLP OR Xenical OR Alli OR 1-((3-Hexyl-4-oxo-2-oxetanyl)methyl)dodecyl-2-formamido 4-methylvalerate OR Ro-18-0647 OR Ro 18 0647) OR ("Bariatric Surgery"[Mesh] OR Surgeries, Bariatric OR Surgery, Bariatric OR Bariatric Surgeries OR Metabolic Surgery OR Metabolic Surgeries OR Surgeries, Metabolic OR Surgery, Metabolic OR …			37
BVS	((mh:("Obesidade") AND instance:"regional") OR (mh:("Sobrepeso") AND instance:"regional")) AND (tirzepatide AND instance:"regional") filtro ensaio clínico controlado			69
Embase	#14	#13 AND ('clinical trial'/de OR 'phase 3 clinical trial'/de OR 'phase 3 clinical trial topic'/de OR 'randomized controlled trial'/de OR 'randomized controlled trial topic'/de)		521
	#13	#1 AND #10 AND #12		1 561
	#12	#2 OR #3 OR #4 OR #5 OR #6 OR #7 OR #8 OR #9 OR #11		156 851
	#11	orlistat'/exp		8 421
	#10	tirzepatide'/exp		2 706
	#9	lixisenatide'/exp		2 704
	#8	semaglutide'/exp		9 129
	#7	dulaglutide'/exp		4 264
	#6	exendin 4'/exp		13 950
	#5	liraglutide'/exp		16 287
	#4	glucagon like peptide 1 receptor agonist'/exp		66 473
	#3	sibutramine'/exp		4 871
	#2	bariatric surgery'/exp		87 303
	#1	obesity'/exp		794 879
Cochrane	#14	#11 AND #12 AND #13		13
	#13	#3 OR #4 OR #5 OR #6 OR #7 OR #8 OR #9 OR #10		7 542
	#12	#1 OR #2		25 912
	#11	MeSH descriptor: [Tirzepatide] explode all trees		179
	#10	MeSH descriptor: [orlistat] explode all trees		348
	#9	lixisenatide		397
	#8	semaglutide		1 663
	#7	dulaglutide		597
	#6	MeSH descriptor: [Exenatide] explode all trees		684
	#5	MeSH descriptor: [Liraglutide] explode all trees		1 025
	#4	MeSH descriptor: [Glucagon-Like Peptide-1 Receptor Agonists] explode all trees		333
	#3	MeSH descriptor: [Bariatric Surgery] explode all trees		1 866
	#2	MeSH descriptor: [Overweight] explode all trees		25 912
	#1	MeSH descriptor: [Obesity] explode all trees		22 085
Web of science	obesity OR Overweight (All Fields) and GLP1 agonist or liraglutide or "Bariatric surgery" or victoria or sabena or betta or olympic or rubellus or aplysia or lixisenatide or aplysia or orlistat (All Fields) and tirzepatide (All Fields) and "clinical trials" or "clinical trial" (All Fields)			83
	Total of recovered titles			723
	Duplicates			140
Total of screened titles				583
