# Supplementary material
Source: Research Square preprint supplement (doi:10.21203/rs.3.rs-9180565/v1)
Supplement: Supplementary file 6 [file 9d52c55645711dd2b9799db3.xlsx]

## Sheet: Sheet1
Table 2 – Medication cost for a 72-week time horizon, according to number of doses in US dollars (February 2026).
Presentation	Time to dose escalation	Doses (n)	Cost/Presentation ($)	Total cost ($)
Tirzepatide 2.5mg	Week 1-4	4	104.73	418.92
Tirzepatide 5mg	Week 5-8	4	104.73	418.92
Tirzepatide 10mg	Week 9-12	4	104.73	418.92
Tirzepatide 15mg	Week ≥ 13	60	104.73	6 283.80
Total in 72 weeks				7 540.56
Semaglutide 0.25mg	Week 1-4	4a	130.75	130.75
Semaglutide 0.5mg	Week 5-8	4	130.75	130.75
Semaglutide 1mg	Week 9-12	4	130.75	130.75
Semaglutide 1.7mg	Week 13-16	4	195.85	195.85
Semaglutide 2.4mg	Week ≥ 17	56b	251.91	3 526.74
Total in 72 weeks				4 114.84
Legend: a 4 doses correspond to one injection pen; b 56 doses correspond to 14 injection pens.
